# Supplementary material
Source: PubMed Central journal article supplement (PMC11484613)
Supplement: web_material_kwac183.pdf [file web_material_kwac183.pdf]

## WEB MATERIAL

### Postpartum Readmissions With and Without Severe Maternal Morbidity Within 1 Year of Birth, Oregon, 2012–2017

Menolly Kaufman, K. John McConnell, Suzan L. Carmichael, Maria I. Rodriguez, Dawn Richardson, and Jonathan M. Snowden

#### Contents

**Web Table 1.** ICD-9/-10 and CPT Codes Used to Capture Postpartum Visit Attendance and Covariates in Medical Claims Data

**Web Table 2.** Unadjusted and Adjusted Cumulative Incidence Ratios for Any Postpartum Readmissions Within 12 Months of Delivery With and Without Evidence of Severe Maternal Morbidity (SMM), Oregon Hospital Births ( $n = 158,653$ ), 2012–2017

**Web Table 3.** Maternal Demographic, Delivery and Clinical Characteristics by Inclusion in and Exclusion From the Analytical Sample

**Web Table 4.** Unadjusted and Adjusted Cumulative Incidence Ratios for Postpartum Readmissions With and Without Evidence of Severe Maternal Morbidity (SMM) Within 60 Days of Childbirth Discharge, Oregon Hospital Births ( $n = 201,048$ ), 2012–2017

**Web Table 5.** Unadjusted and Adjusted Cumulative Incidence Ratios for Postpartum Readmissions With and Without Evidence of Severe Maternal Morbidity (SMM) Excluding Blood Transfusions From the SMM Definition, Oregon Hospital Deliveries ( $n = 158,653$ ), 2012–2017

**Web Table 1.** ICD-9/-10 and CPT Codes Used to Capture Postpartum Visit Attendance and Covariates in Medical Claims Data

| Category                                        | ICD-9                                                                                                                                                                                                                                                                                                                                                                                                                                                                                                                    | ICD-10                                                                                                                                                                                                                                                                                                                                                                                                                                                                                                                                                                                                                                                                                                                                                                                                                                                                                                                                                                                                                                                                                                                                                                                                                                                                                                                                                                                                                                                                                                                                                                                                   |
|-------------------------------------------------|--------------------------------------------------------------------------------------------------------------------------------------------------------------------------------------------------------------------------------------------------------------------------------------------------------------------------------------------------------------------------------------------------------------------------------------------------------------------------------------------------------------------------|----------------------------------------------------------------------------------------------------------------------------------------------------------------------------------------------------------------------------------------------------------------------------------------------------------------------------------------------------------------------------------------------------------------------------------------------------------------------------------------------------------------------------------------------------------------------------------------------------------------------------------------------------------------------------------------------------------------------------------------------------------------------------------------------------------------------------------------------------------------------------------------------------------------------------------------------------------------------------------------------------------------------------------------------------------------------------------------------------------------------------------------------------------------------------------------------------------------------------------------------------------------------------------------------------------------------------------------------------------------------------------------------------------------------------------------------------------------------------------------------------------------------------------------------------------------------------------------------------------|
| Substance Use Disorder (excluding cannabis use) | 291.0-291.5, 291.81, 291.82, 291.89, 291.9, 292.0, 292.11, 292.12, 292.2, 292.81-292.85, 292.89, 292.9, 303.00-303.03, 303.90-303.93, 304.00-304.03, 304.10-304.13, 304.11, 304.12, 304.20-304.23, 304.21, 304.22, 304.30-304.33, 304.31, 304.32, 304.40-304.43, 304.41, 304.42, 304.50-304.53, 304.60-304.63, 304.70-304.73, 304.80-304.83, 304.90-304.93, 305.00-305.03, 305.1, 305.20-305.23, 305.30-305.33, 305.40-305.43, 305.41, 305.42, 305.50-305.53, 305.60-305.63, 305.70-305.73, 305.80-305.83, 305.90-305.93 | F10.10, F10.120, F10.121, F10.129, F10.14, F10.150, F10.151, F10.159, F10.180, F10.181, F10.182, F10.188, F10.19, F10.20, F10.21, F10.220, F10.221, F10.229, F10.230-F10.232, F10.239, F10.24, F10.250, F10.251, F10.259, F10.26, F10.27, F10.280-F10.282, F10.288, F10.29, F10.920, F10.921, F10.929, F10.94, F10.950, F10.951, F10.959, F10.96, F10.97, F10.980-F10.982, F10.988, F10.99, F11.10, F11.120-F11.122, F11.129, F11.14, F11.150, F11.151, F11.159, F11.181, F11.182, F11.188, F11.19-F11.21, F11.220-F11.222, F11.229, F11.23, F11.24, F11.250, F11.251, F11.259, F11.281, F11.282, F11.288, F11.29, F11.90, F11.920-F11.922, F11.929, F11.93, F11.94, F11.950, F11.951, F11.959, F11.981, F11.982, F11.988, F11.99, F13.10, F13.120, F13.121, F13.129, F13.14, F13.150, F13.151, F13.159, F13.180-F13.182, F13.188, F13.19-F13.21, F13.220, F13.221, F13.229, F13.230-F13.232, F13.239, F13.24, F13.250, F13.251, F13.259, F13.26, F13.27, F13.280-F13.282, F13.288, F13.29, F13.90, F13.920, F13.921, F13.929, F13.930-F13.932, F13.939, F13.94, F13.950, F13.951, F13.959, F13.96, F13.97, F13.980-F13.982, F13.988, F13.99, F14.10, F14.120-F14.122, F14.129, F14.14, F14.150, F14.151, F14.159, F14.180-F14.182, F14.188, F14.19-F14.21, F14.220-F14.222, F14.229, F14.23, F14.24, F14.250, F14.251, F14.259, F14.280-F14.282, F14.288, F14.29, F14.90, F14.920-F14.922, F14.929, F14.94, F14.950, F14.951, F14.959, F14.980-F14.982, F14.988, F14.99, F15.10, F15.120-F15.122, F15.129, F15.14, F15.150, F15.151, F15.159, F15.180-F15.182, F15.188, F15.19-F15.21, F15.220-F15.222, |

F15.229, F15.23, F15.24, F15.250, F15.251, F15.259, F15.280-F15.282, F15.288, F15.29, F15.90, F15.920-F15.922, F15.929, F15.93, F15.94, F15.950, F15.951, F15.959, F15.980-F15.982, F15.988, F15.99, F16.10, F16.120-F16.122, F16.129, F16.14, F16.150, F16.151, F16.159, F16.180, F16.183, F16.188, F16.19-F16.21, F16.220, F16.221, F16.229, F16.24, F16.250, F16.251, F16.259, F16.280, F16.283, F16.288, F16.29, F16.90, F16.920, F16.921, F16.929, F16.94, F16.950, F16.951, F16.959, F16.980, F16.983, F16.988, F16.99, F17.200, F17.201, F17.203, F17.208-F17.211, F17.213, F17.218-F17.221, F17.223, F17.228, F17.229, F17.290-F17.293, F17.298, F17.299, F18.10, F18.120, F18.121, F18.129, F18.14, F18.150, F18.151, F18.159, F18.17, F18.180, F18.188, F18.19-F18.21, F18.220, F18.221, F18.229, F18.24, F18.250, F18.251, F18.259, F18.27, F18.280, F18.288, F18.29, F18.90, F18.920, F18.921, F18.929, F18.94, F18.950, F18.951, F18.959, F18.97, F18.980, F18.988, F18.99, F19.10, F19.120-F19.122, F19.129, F19.14, F19.150, F19.151, F19.159, F19.16, F19.17, F19.180-F19.182, F19.188, F19.19-F19.21, F19.220-F19.222, F19.229, F19.230-F19.232, F19.239, F19.24, F19.250, F19.251, F19.259, F19.26, F19.27, F19.280-F19.282, F19.288, F19.29, F19.90, F19.920-F19.922, F19.929, F19.930-F19.932, F19.939, F19.94, F19.950, F19.951, F19.959, F19.96, F19.97, F19.980-F19.982, F19.988, F19.99, F55.0-F55.4, F55.8

|                                                                                                                               |                                                                                                                                                                                                                                                                                                                                                                                              |                                                                                                                                                                                                                                                                                                                                                                                                                               |
|-------------------------------------------------------------------------------------------------------------------------------|----------------------------------------------------------------------------------------------------------------------------------------------------------------------------------------------------------------------------------------------------------------------------------------------------------------------------------------------------------------------------------------------|-------------------------------------------------------------------------------------------------------------------------------------------------------------------------------------------------------------------------------------------------------------------------------------------------------------------------------------------------------------------------------------------------------------------------------|
| Substance Use Disorder:<br>Cannabis Use                                                                                       | 304.30-304.33, 305.20-305.23                                                                                                                                                                                                                                                                                                                                                                 | F12.10, F12.120-F12.122, F12.129, F12.150, F12.151, F12.159, F12.180, F12.188, F12.19, F12.20, F12.21, F12.220-F12.222, F12.229, F12.250, F12.251, F12.259, F12.280, F12.288, F12.29, F12.90, F12.920-F12.922, F12.929, F12.950, F12.951, F12.959, F12.980, F12.988, F12.99                                                                                                                                                   |
| Mental Health:<br>Depressive (Not Major Depression Disorder)*                                                                 | 290.13, 290.21, 296.82, 301.12, 309.1, 311                                                                                                                                                                                                                                                                                                                                                   | F25.1, F32.8, F33.8                                                                                                                                                                                                                                                                                                                                                                                                           |
| Mental Health: Anxiety                                                                                                        | 293.84, 300.00-300.02, 300.09, 300.10, 300.20-300.23, 300.29, 300.3                                                                                                                                                                                                                                                                                                                          | F40.00-F40.02, F40.10, F40.11, F40.210, F40.218, F40.220, F40.228, F40.230-F40.233, F40.240-F40.243, F40.248, F40.290, F40.291, F40.298, F40.8, F40.9, F41.0, F41.1, F41.3, F41.8, F41.9, F42, F45.20, F45.21, F45.29, F40.00, F40.01, F40.02, F40.10, F40.11, F40.210, F40.218, F40.220, F40.228, F40.230-F40.233, F40.240-F40.243, F40.248, F40.290, F40.291, F40.298, F40.8, F40.9, F41.0, F41.1, F41.3, F41.8, F41.9, F42 |
| Mental Health: Serious Mental Illness (includes bipolar conditions, major depressive disorders, schizophrenia, and psychoses) | 293.0, 293.1, 293.81, 293.82, 295.00-295.05, 295.10-295.15, 295.20-295.25, 295.30-295.35, 295.40-295.45, 295.50-295.55, 295.60-295.65, 295.70-295.75, 295.80-295.85, 295.90-295.95, 296.00-296.06, 296.10-296.16, 296.20-296.26, 296.30-296.36, 296.40-296.46, 296.50-296.56, 296.60-296.66, 296.7, 296.80, 296.81, 296.89, 296.90, 296.99, 297.3, 298.0, 298.1, 298.4, 298.8, 298.9, 301.13 | F20.0-F20.3, F20.5, F20.81, F20.89, F20.9, F21, F22, F23, F24, F25.0, F25.1, F25.8, F25.9, F28, F29, F30.10-F30.13, F30.2-F30.4, F30.8, F30.9, F31.0, F31.10-F31.13, F31.2, F31.30-F31.32, F31.4, F31.5, F31.60-F31.64, F31.70-F31.78, F31.81, F31.89, F31.9, F32.0-F32.5, F32.9, F33.0-F33.3, F33.40-F33.42, F33.9, F34.0                                                                                                    |

Mental Health: Other

290.0, 290.10-290.12, 290.20, 290.3, 290.40-290.43, 290.8, 290.9, 293.0, 293.1, 293.81-293.83, 293.89, 293.9, 294.0, 294.10, 294.11, 294.20, 294.21, 294.8, 294.9, 297.0-297.3, 297.8, 297.9, 298.2, 298.3, 299.00, 299.01, 299.10, 299.11, 299.80, 299.81, 299.90, 299.91, 300.11-300.16, 300.19, 300.5-300.7, 300.81, 300.82, 300.89, 300.9, 301.0, 301.10, 301.11, 301.20-301.22, 301.3, 301.4, 301.50, 301.51, 301.59, 301.6, 301.7, 301.81-301.84, 301.89, 301.9, 302.0-302.4, 302.50-302.53, 302.6, 302.70-302.76, 302.79, 302.81-302.85, 302.89, 302.9, 306.0-306.4, 306.50-306.53, 306.59, 306.6-306.9, 307.0, 307.1, 307.20, 307.21, 307.22, 307.23, 307.3, 307.4-307.54, 307.59, 307.6, 307.7, 307.80, 307.81, 307.89, 307.9, 308.0-308.4, 308.9, 309.0, 309.21-309.24, 309.28, 309.29, 309.3, 309.4, 309.81-309.83, 309.89, 309.9, 310.0-310.2, 310.81, 310.89, 310.9, 312.00-312.03, 312.10-312.13, 312.20-312.23, 312.30-312.35, 312.39, 312.4, 312.81, 312.82, 312.89, 312.9, 313.0, 313.1, 313.21-313.23, 313.3, 313.81-313.83, 313.89, 313.9, 314.00, 314.01, 314.1, 314.2, 314.8, 314.9, 315.00-315.02, 315.09, 315.1, 315.2, 315.31-315.35, 315.39, 315.4, 315.5, 315.8, 315.9, 316

F03.90, F03.91, F34.8, F34.9, F39, F42, F43.0, F43.10-F43.12, F43.20-F43.25, F43.29, F43.8, F43.9, F44.0-F44.2, F44.4-F44.7, F44.81, F44.89, F44.9, F45.0, F45.1, F45.20-F45.22, F45.29, F45.41, F45.42, F45.8, F45.9, F48.1, F48.2, F48.8, F48.9, F50.00-F50.02, F50.2, F50.8, F50.9, F51.01-F51.05, F51.09, F51.11-F51.13, F51.19, F51.3-F51.5, F51.8, F51.9, F52.0, F52.1, F52.21, F52.22, F52.31, F52.32, F52.4-F52.6, F52.8, F52.9, F53, F59, F60.0-F60.7, F60.81, F60.89, F60.9, F63.0-F63.3, F63.81, F63.89, F63.9, F64.1, F64.2, F64.8, F64.9, F65.0-F65.4, F65.50-F65.52, F65.81, F65.89, F65.9, F66, F68.10, F68.11, F68.12, F68.13, F68.8, F69, F80.0-F80.2, F80.4, F80.81, F80.89, F80.9, F81.0, F81.2, F81.81, F81.89, F81.9, F82, F84.0, F84.2, F84.3, F84.5, F84.8, F84.9, F88, F89, F90.0-F90.2, F90.8, F90.9, F91.0-F91.3, F91.8, F91.9, F93.0, F93.8, F93.9, F94.0-F94.2, F94.8, F94.9, F95.0-F95.2, F95.8, F95.9, F98.0, F98.1, F98.21, F98.29, F98.3-F98.5, F98.8, F98.9, F99

Prepregnancy Diabetes

250.00-250.03, 250.10-250.13, 250.20-250.23,  
250.30-250.33, 250.40-250.43,250.50-250.53,  
250.60-250.63, 250.70-250.73, 250.80-250.81,  
250.82, 250.83, 250.90-250.93, 357.2, 362.01-  
362.04, 362.05-362.07, 366.41, 648.00-648.04

E10.10, E10.11, E10.21,E10.22, E10.29, E10.311, E10.319,  
E10.321, E10.3211-E10.3213, E10.3219, E10.329,  
E10.3291-E10.3293, E10.3299, E10.331, E10.3311-  
E10.3313, E10.3319, E10.339, E10.3391-E10.3393,  
E10.3399, E10.341, E10.3411-E10.3413, E10.3419,  
E10.349, E10.3491-E10.3493, E10.3499, E10.351,  
E10.3511-E10.3513, E10.3519, E10.3521-E10.3523,  
E10.3529, E10.3531-E10.3533, E10.3539,  
E10.3541-E10.3543, E10.3549, E10.3551-E10.3553,  
E10.3559, E10.359, E10.3591-E10.3593, E10.3599, E10.36,  
E10.37X1-E10.37X3, E10.37X9, E10.39, E10.40-E10.44,  
E10.49, E10.51, E10.52, E10.59, E10.610, E10.618,  
E10.620-E10.622, E10.628, E10.630, E10.638, E10.641,  
E10.649, E10.65, E10.69, E10.8, E10.9, E11.00, E11.01,  
E11.10, E11.11, E11.21, E11.22, E11.29, E11.311, E11.319,  
E11.321, E11.3211-E11.3213, E11.3219, E11.329,  
E11.3291-E11.3293, E11.3299, E11.331, E11.3311-  
E11.3313, E11.3319, E11.339, E11.3391-E11.3393,  
E11.3399, E11.341, E11.3411-E11.3413, E11.3419,  
E11.349, E11.3491-E11.3493, E11.3499, E11.351,  
E11.3511-E11.3513, E11.3519, E11.3521-E11.3523,  
E11.3529, E11.3531-E11.3533, E11.3539, E11.3541-  
E11.3543, E11.3549, E11.3551-E11.3553, E11.3559,  
E11.359, E11.3591-E11.3593, E11.3599, E11.36,  
E11.37X1-E11.37X3, E11.37X9, E11.39, E11.40-E11.44,  
E11.49, E11.51, E11.52, E11.59, E11.610, E11.618,  
E11.620-E11.622, E11.628, E11.630, E11.638, E11.641,  
E11.649, E11.65, E11.69, E11.8, E11.9, E13.00E13.01,  
E13.10, E13.11, E13.21, E13.22, E13.29, E13.311, E13.319,  
E13.321, E13.3211-E13.3213, E13.3219, E13.329,  
E13.3291-E13.3293, E13.3299, E13.331, E13.3311-  
E13.3313, E13.3319, E13.339, E13.3391-E13.3393,  
E13.3399, E13.341, E13.3411-E13.3413, E13.3419,

|                          |                                             |                                                                                                                                                                                                                                                                                                                                                                                                                                                                                                                                                                                                                      |
|--------------------------|---------------------------------------------|----------------------------------------------------------------------------------------------------------------------------------------------------------------------------------------------------------------------------------------------------------------------------------------------------------------------------------------------------------------------------------------------------------------------------------------------------------------------------------------------------------------------------------------------------------------------------------------------------------------------|
|                          |                                             | E13.349, E13.3491-E13.3493, E13.3499, E13.351, E13.3511-E13.3513, E13.3519, E13.3521-E13.3523, E13.3529, E13.3531-E13.3533, E13.3539, E13.3541-E13.3543, E13.3549, E13.3551-E13.3553, E13.3559, E13.359, E13.3591-E13.3593, E13.3599, E13.36, E13.37X1-E13.37X3, E13.37X9, E13.39-E13.44, E13.49, E13.51, E13.52, E13.59, E13.610, E13.618, E13.620E13.621, E13.622, E13.628, E13.630, E13.638, E13.641, E13.649, E13.65, E13.69, E13.8, E13.9, O24.011-O24.013, O24.019,O24.02,O24.03, O24.111-O24.113, O24.119, O24.12, O24.13, O24.311-O24.313, O24.319, O24.32, O24.33, O24.811-O24.813, O24.819, O24.82, O24.83 |
| Gestational Diabetes     | 648.8, 648.80-648.84                        | O24.4, O24.41, O24.410, O24.414, O24.415, O24.419, O24.42, O24.420, O24.424, O24.425, O24.429, O24.43, O24.430, O24.434, O24.435, O24.439                                                                                                                                                                                                                                                                                                                                                                                                                                                                            |
| Chronic Hypertension     | 642.00-642.04, 642.10-642.14, 642.20-642.24 | O10.011-O10.013, O10.019, O10.02, O10.03, O10.111-O10.113, O10.119, O10.12, O10.13, O10.211-O10.213, O10.219, O10.22, O10.23, O10.311-O10.313, O10.319, O10.32, O10.33, O10.411-O10.413, O10.419, O10.42, O10.43, O10.911-O10.913, O10.919, O10.92, O10.93                                                                                                                                                                                                                                                                                                                                                           |
| Gestational Hypertension | 642.30-642.34                               | O13.1-O13.3, O13.9, O16.1-O16.3, O16.9                                                                                                                                                                                                                                                                                                                                                                                                                                                                                                                                                                               |
| Eclampsia/Pre-eclampsia  | 642.40-642.44, 642.50-642.54, 642.60-642.64 | O14.00-O14.03,O14.10-O14.13, O14.20-O14.23,O14.90-O14.93,O15.00,O15.03, O15.1, O15.2, O15.9                                                                                                                                                                                                                                                                                                                                                                                                                                                                                                                          |
| Superimposed             | 642.71-642.74                               | O11.1-O11.3, O11.9                                                                                                                                                                                                                                                                                                                                                                                                                                                                                                                                                                                                   |

**Web Table 2.** Unadjusted and Adjusted Cumulative Incidence Ratios for Any Postpartum Readmissions Within 12 Months of Delivery With and Without Evidence of Severe Maternal Morbidity (SMM), Oregon Hospital Births ( $n = 158,653$ ), 2012–2017

| Characteristic                                         | Postpartum Readmission<br><i>With Evidence of SMM</i> |            |         |            | Postpartum Readmission<br><i>Without Evidence of SMM</i> |            |         |            |
|--------------------------------------------------------|-------------------------------------------------------|------------|---------|------------|----------------------------------------------------------|------------|---------|------------|
|                                                        | RR                                                    | 95% CI     | Adj. RR | 95% CI     | RR                                                       | 95% CI     | Adj. RR | 95% CI     |
| <b>Maternal Age</b>                                    |                                                       |            |         |            |                                                          |            |         |            |
| 15-19                                                  | 1.27                                                  | 0.96, 1.68 | 1.27    | 0.97, 1.68 | 1.58                                                     | 1.40, 1.79 | 1.58    | 1.40, 1.79 |
| 20-24                                                  | 0.93                                                  | 0.76, 1.13 | 0.93    | 0.76, 1.14 | 1.15                                                     | 1.05, 1.26 | 1.15    | 1.05, 1.26 |
| 25-29                                                  | 1.00                                                  | Referent   | 1.00    | Referent   | 1.00                                                     | Referent   | 1.00    | Referent   |
| 30-34                                                  | 0.85                                                  | 0.70, 1.03 | 0.85    | 0.70, 1.03 | 0.86                                                     | 0.79, 0.95 | 0.86    | 0.79, 0.95 |
| 35-39                                                  | 1.11                                                  | 0.89, 1.38 | 1.11    | 0.89, 1.38 | 0.91                                                     | 0.81, 1.02 | 0.91    | 0.81, 1.02 |
| ≥40                                                    | 1.33                                                  | 0.93, 1.91 | 1.33    | 0.93, 1.92 | 1.00                                                     | 0.82, 1.23 | 1.00    | 0.82, 1.23 |
| <b>Maternal Residential Location<sup>a</sup></b>       |                                                       |            |         |            |                                                          |            |         |            |
| Urban                                                  | 1.00                                                  | Referent   | 1.00    | Referent   | 1.00                                                     | Referent   | 1.00    | Referent   |
| Rural                                                  | 1.14                                                  | 0.99, 1.32 | 1.15    | 0.99, 1.32 | 1.09                                                     | 1.01, 1.16 | 1.05    | 0.97, 1.12 |
| <b>Insurance Type at Delivery<sup>b</sup></b>          |                                                       |            |         |            |                                                          |            |         |            |
| Commercial                                             | 1.00                                                  | Referent   | 1.00    | Referent   | 1.00                                                     | Referent   | 1.00    | Referent   |
| Medicaid                                               | 2.12                                                  | 1.80, 2.48 | 2.06    | 1.73, 2.45 | 1.79                                                     | 1.66, 1.93 | 1.56    | 1.43, 1.69 |
| <b>Mode of Delivery<sup>c</sup></b>                    |                                                       |            |         |            |                                                          |            |         |            |
| Vaginal                                                | 1.00                                                  | Referent   | 1.00    | Referent   | 1.00                                                     | Referent   | 1.00    | Referent   |
| Cesarean                                               | 1.64                                                  | 1.43, 1.89 | 1.49    | 1.29, 1.72 | 1.43                                                     | 1.33, 1.53 | 1.38    | 1.28, 1.48 |
| <b>Extended Delivery Length of Stay<sup>d</sup></b>    | 2.33                                                  | 2.01, 2.70 | 1.87    | 1.60, 2.18 | 1.84                                                     | 1.70, 1.98 | 1.45    | 1.34, 1.57 |
| <b>SMM at Delivery<sup>e</sup></b>                     | 7.49                                                  | 5.62, 9.97 | 5.55    | 4.14, 7.44 | 2.40                                                     | 1.89, 3.04 | 1.89    | 1.49, 2.40 |
| <b>Prepregnancy Diabetes<sup>f</sup></b>               | 2.95                                                  | 2.20, 3.95 | 2.84    | 2.12, 3.82 | 1.22                                                     | 1.09, 1.36 | 2.85    | 2.47, 3.30 |
| <b>Gestational Diabetes<sup>f</sup></b>                | 1.02                                                  | 0.80, 1.30 | 1.03    | 0.81, 1.31 | 2.83                                                     | 2.45, 3.27 | 1.31    | 1.17, 1.46 |
| <b>Hypertensive Disorders of Pregnancy<sup>g</sup></b> |                                                       |            |         |            |                                                          |            |         |            |
| Any                                                    | 2.31                                                  | 1.94, 2.74 | 2.26    | 1.90, 2.69 | 1.87                                                     | 1.71, 2.04 | 1.83    | 1.68, 2.01 |
| No evidence                                            | 1.00                                                  | Referent   | 1.00    | Referent   | 1.00                                                     | Referent   | 1.00    | Referent   |
| <b>Hypertensive Disorders of Pregnancy<sup>g</sup></b> |                                                       |            |         |            |                                                          |            |         |            |
| Chronic Hypertension                                   | 2.82                                                  | 2.10, 3.80 | 2.76    | 2.05, 3.72 | 2.15                                                     | 1.83, 2.52 | 2.17    | 1.85, 2.55 |
| Gestational Hypertension                               | 1.76                                                  | 1.32, 2.34 | 1.72    | 1.29, 2.30 | 1.30                                                     | 1.11, 1.53 | 1.29    | 1.10, 1.51 |
| Preeclampsia/Eclampsia                                 | 2.97                                                  | 2.20, 4.00 | 2.91    | 2.15, 3.93 | 2.04                                                     | 1.72, 2.42 | 1.97    | 1.66, 2.34 |



|                                            |      |            |      |            |      |            |      |            |
|--------------------------------------------|------|------------|------|------------|------|------------|------|------------|
| Superimposed                               | 2.01 | 1.26, 3.20 | 1.96 | 1.23, 3.12 | 2.80 | 2.33, 3.37 | 2.68 | 2.23, 3.22 |
| No evidence                                | 1.00 | Referent   | 1.00 | Referent   | 1.00 | Referent   | 1.00 | Referent   |
| <b>Substance Use Disorder<sup>h</sup></b>  |      |            |      |            |      |            |      |            |
| Any                                        | 2.80 | 2.31, 3.39 | 2.72 | 2.23, 3.31 | 2.22 | 2.01, 2.46 | 1.91 | 1.72, 2.12 |
| Any (excluding cannabis)                   | 3.00 | 2.46, 3.66 | 2.90 | 2.36, 3.56 | 2.33 | 2.10, 2.59 | 2.01 | 1.80, 2.24 |
| <b>Mental Health Diagnosis<sup>i</sup></b> |      |            |      |            |      |            |      |            |
| Any MH                                     | 1.51 | 1.21, 1.88 | 1.50 | 1.20, 1.87 | 2.16 | 1.96, 2.37 | 2.10 | 1.91, 2.30 |
| Depressive                                 | 2.08 | 1.39, 3.12 | 2.06 | 1.37, 3.09 | 2.23 | 1.85, 2.69 | 2.14 | 1.78, 2.58 |
| Anxiety                                    | 1.49 | 1.08, 2.05 | 1.48 | 1.07, 2.04 | 2.06 | 1.80, 2.35 | 2.02 | 1.77, 2.31 |
| Serious Mental Illness                     | 1.28 | 0.89, 1.84 | 1.27 | 0.88, 1.83 | 2.42 | 2.12, 2.75 | 2.37 | 2.08, 2.69 |
| Other                                      | 1.71 | 1.10, 2.66 | 1.69 | 1.08, 2.63 | 2.89 | 2.45, 3.40 | 2.74 | 2.33, 3.23 |

**Notes:** SMM, severe maternal morbidity.

**a.** Model adjusted for maternal age.

**b.** Model adjusted for maternal age, maternal residential location, any substance use disorder (SUD), and any mental health (MH) diagnosis.

**c.** Model adjusted for maternal age, maternal residential location, insurance type at delivery, any SUD, any MH diagnosis, any diabetes, and any hypertensive disorders of pregnancy (HDP).

**d.** Model adjusted for maternal age, maternal residential location, insurance type at delivery, any SUD, any MH diagnosis, any diabetes, HDP, and mode of delivery.

**e.** Model adjusted for maternal age, maternal residential location, insurance type at delivery, any diabetes, and HDP.

**f.** Model adjusted for maternal age, maternal residential location, any SUD, and any MH diagnosis.

**g.** Models adjusted for maternal age, maternal residential location, any SUD, and any MH diagnosis.

**h.** Model adjusted for maternal age, maternal residential location, and any MH diagnosis.

**i.** Model adjusted for maternal age and maternal residential location.

**Web Table 3.** Maternal Demographic, Delivery, and Clinical Characteristics by Inclusion in and Exclusion From the Analytical Sample

| <b>Characteristic</b>                          | <b>Included in Analytical Sample<br/>(≥11 months of postpartum insurance enrollment)<br/>(n = 158,653)<br/>No. (%)</b> | <b>Excluded From Analytical Sample<br/>(&lt;11 months of postpartum insurance enrollment)<br/>(n = 43,592)<br/>No. (%)</b> | <b>P Value</b> |
|------------------------------------------------|------------------------------------------------------------------------------------------------------------------------|----------------------------------------------------------------------------------------------------------------------------|----------------|
| <b>Maternal Age</b>                            |                                                                                                                        |                                                                                                                            | <0.001         |
| 15-19                                          | 9,853 (6.2)                                                                                                            | 2,981 (6.8)                                                                                                                |                |
| 20-24                                          | 34,417 (21.7)                                                                                                          | 11,114 (25.5)                                                                                                              |                |
| 25-29                                          | 45,085 (28.4)                                                                                                          | 13,780 (31.6)                                                                                                              |                |
| 30-34                                          | 43,043 (27.1)                                                                                                          | 10,112 (23.2)                                                                                                              |                |
| 35-39                                          | 21,460 (13.5)                                                                                                          | 4,542 (10.4)                                                                                                               |                |
| ≥40                                            | 4,795 (3.0)                                                                                                            | 1,063 (2.4)                                                                                                                |                |
| <b>Maternal Residential Location</b>           |                                                                                                                        |                                                                                                                            | <0.001         |
| Urban                                          | 103,353 (65.1)                                                                                                         | 27,329 (62.7)                                                                                                              |                |
| Rural                                          | 55,297 (34.9)                                                                                                          | 16,263 (37.3)                                                                                                              |                |
| Missing                                        | 3 (0.0)                                                                                                                | 0 (0%)                                                                                                                     |                |
| <b>Insurance Type at Delivery</b>              |                                                                                                                        |                                                                                                                            | <0.001         |
| Commercial                                     | 64,165 (40.4)                                                                                                          | 13,982 (32.1)                                                                                                              |                |
| Medicaid                                       | 94,488 (59.6)                                                                                                          | 29,610 (67.9)                                                                                                              |                |
| <b>Mode of Delivery</b>                        |                                                                                                                        |                                                                                                                            | 0.0144         |
| Vaginal                                        | 113,496 (71.5)                                                                                                         | 31,445 (72.1)                                                                                                              |                |
| Cesarean                                       | 45,157 (28.5)                                                                                                          | 12,147 (27.9)                                                                                                              |                |
| <b>Extended Delivery Length of Stay</b>        | 26,344 (16.6)                                                                                                          | 8,134 (18.7)                                                                                                               | <0.001         |
| <b>SMM at Delivery</b>                         | 1,366 (0.9)                                                                                                            | 381 (0.9)                                                                                                                  | 0.8076         |
| <b>Prepregnancy Diabetes</b>                   | 3,380 (2.1)                                                                                                            | 778 (1.8)                                                                                                                  | <0.001         |
| <b>Gestational Diabetes</b>                    | 16,577 (10.4)                                                                                                          | 4,175 (9.6)                                                                                                                | <0.001         |
| <b>Any Hypertensive Disorders of Pregnancy</b> | 15,459 (9.7)                                                                                                           | 4,118 (9.4)                                                                                                                | 0.0644         |
| <b>Hypertensive Disorders of Pregnancy</b>     |                                                                                                                        |                                                                                                                            | <0.001         |
| Chronic                                        | 3,676 (2.3)                                                                                                            | 847 (1.9)                                                                                                                  |                |

|                                |                |               |        |
|--------------------------------|----------------|---------------|--------|
| Gestational Hypertension       | 6,315 (4.0)    | 1,718 (3.9)   |        |
| Pre-eclampsia/Eclampsia        | 3,416 (2.2)    | 967 (2.2)     |        |
| Superimposed                   | 2,052 (1.3)    | 586 (1.3)     |        |
| No Evidence                    | 143,194 (90.3) | 39,474 (90.6) |        |
| <b>Substance Use Disorder</b>  |                |               |        |
| Any                            | 9,686 (6.1)    | 2,322 (5.3)   | <0.001 |
| Any (excluding cannabis)       | 8,200 (5.2)    | 1,871 (4.3)   | <0.001 |
| <b>Mental Health Diagnosis</b> |                |               |        |
| Any                            | 11,877 (7.5)   | 2,544 (5.8)   | <0.001 |
| Depressive                     | 2,356 (1.5)    | 519 (1.2)     | <0.001 |
| Anxiety                        | 5,347 (3.4)    | 1,131 (2.6)   | <0.001 |
| Serious Mental Illness         | 4,786 (3.0)    | 1,001 (2.3)   | <0.001 |
| Other                          | 2,414 (1.5)    | 468 (1.1)     | <0.001 |

**Note:** SMM, severe maternal morbidity.



|                                            |      |            |      |            |      |            |      |            |
|--------------------------------------------|------|------------|------|------------|------|------------|------|------------|
| Chronic Hypertension                       | 2.99 | 2.03, 4.42 | 2.87 | 1.95, 4.25 | 2.71 | 2.20, 3.35 | 2.70 | 2.19, 3.34 |
| Gestational Hypertension                   | 1.85 | 1.27, 2.68 | 1.82 | 1.25, 2.64 | 1.83 | 1.51, 2.22 | 1.81 | 1.49, 2.20 |
| Preeclampsia/Eclampsia                     | 4.21 | 3.01, 5.90 | 4.20 | 3.00, 5.88 | 2.43 | 1.94, 3.05 | 2.35 | 1.87, 2.95 |
| Superimposed                               | 2.3  | 1.30, 4.09 | 2.29 | 1.29, 4.07 | 3.52 | 2.77, 4.47 | 3.41 | 2.68, 4.34 |
| No evidence                                | 1.00 | Referent   | 1.00 | Referent   | 1.00 | Referent   | 1.00 | Referent   |
| <b>Substance Use Disorder<sup>h</sup></b>  |      |            |      |            |      |            |      |            |
| Any                                        | 2.68 | 2.08, 3.46 | 2.76 | 2.12, 3.59 | 1.72 | 1.47, 2.02 | 1.58 | 1.34, 1.86 |
| Any (excluding cannabis)                   | 3.02 | 2.32, 3.92 | 3.09 | 2.36, 4.05 | 1.87 | 1.58, 2.21 | 1.72 | 1.45, 2.03 |
| <b>Mental Health Diagnosis<sup>i</sup></b> |      |            |      |            |      |            |      |            |
| Any                                        | 1.35 | 0.99, 1.84 | 1.36 | 1.00, 1.86 | 1.71 | 1.48, 1.99 | 1.68 | 1.45, 1.95 |
| Depressive                                 | 1.68 | 0.92, 3.05 | 1.71 | 0.94, 3.10 | 1.73 | 1.27, 2.35 | 1.69 | 1.24, 2.30 |
| Anxiety                                    | 1.42 | 0.92, 2.20 | 1.43 | 0.92, 2.21 | 1.76 | 1.43, 2.17 | 1.74 | 1.42, 2.15 |
| Sevrious Mental Illness                    | 1.21 | 0.74, 1.99 | 1.22 | 0.74, 2.00 | 2.07 | 1.69, 2.54 | 2.04 | 1.67, 2.50 |
| Other                                      | 1.39 | 0.72, 2.68 | 1.40 | 0.72, 2.70 | 2.25 | 1.72, 2.95 | 2.16 | 1.65, 2.84 |

**Notes:** SMM, severe maternal morbidity.

**a.** Model adjusted for maternal age.

**b.** Model adjusted for maternal age, maternal residential location, any substance use disorder (SUD), and any mental health (MH) diagnosis.

**c.** Model adjusted for maternal age, maternal residential location, insurance type at delivery, any SUD, any MH diagnosis, any diabetes, and any hypertensive disorders of pregnancy (HDP).

**d.** Model adjusted for maternal age, maternal residential location, insurance type at delivery, any SUD, any MH diagnosis, any diabetes, HDP, and mode of delivery.

**e.** model adjusts for maternal age, maternal residential location, insurance type at delivery, any diabetes, and HDP.

**f.** Model adjusted for maternal age, maternal residential location, any SUD, and any MH diagnosis.

**g.** Models adjusted for maternal age, maternal residential location, any SUD, and any MH diagnosis.

**h.** Model adjusted for maternal age, maternal residential location, and any MH diagnosis.

**i.** Model adjusted for maternal age and maternal residential location.

**Web Table 5.** Unadjusted and Adjusted Cumulative Incidence Ratios for Postpartum Readmissions With and Without Evidence of Severe Maternal Morbidity (SMM) Excluding Blood Transfusions From the SMM definition, Oregon Hospital Deliveries ( $n = 158,653$ ), 2012–2017

| Characteristic                                            | Postpartum Readmission<br><i>With</i> Evidence of SMM |             |         |            | Postpartum Readmission<br><i>Without</i> Evidence of SMM |            |         |            |
|-----------------------------------------------------------|-------------------------------------------------------|-------------|---------|------------|----------------------------------------------------------|------------|---------|------------|
|                                                           | RR                                                    | 95% CI      | Adj. RR | 95% CI     | RR                                                       | 95% CI     | Adj. RR | 95% CI     |
| <b>Maternal Age</b>                                       |                                                       |             |         |            |                                                          |            |         |            |
| 15-19                                                     | 1.25                                                  | 0.94, 1.67  | 1.25    | 0.94, 1.67 | 1.58                                                     | 1.39, 1.79 | 1.58    | 1.39, 1.79 |
| 20-24                                                     | 0.91                                                  | 0.74, 1.12  | 0.91    | 0.74, 1.12 | 1.15                                                     | 1.05, 1.26 | 1.15    | 1.05, 1.26 |
| 25-29                                                     | 1.00                                                  | Referent    | 1.00    | Referent   | 1.00                                                     | Referent   | 1.00    | Referent   |
| 30-34                                                     | 0.87                                                  | 0.72, 1.06  | 0.87    | 0.72, 1.06 | 0.86                                                     | 0.78, 0.95 | 0.86    | 0.78, 0.95 |
| 35-39                                                     | 1.10                                                  | 0.88, 1.38  | 1.10    | 0.88, 1.38 | 0.91                                                     | 0.81, 1.02 | 0.91    | 0.81, 1.02 |
| ≥40                                                       | 1.37                                                  | 0.95, 1.99  | 1.37    | 0.95, 1.99 | 1.00                                                     | 0.81, 1.22 | 1.00    | 0.81, 1.22 |
| <b>Maternal Residential Location<sup>a</sup></b>          |                                                       |             |         |            |                                                          |            |         |            |
| Urban                                                     | 1.00                                                  | Referent    | 1.00    | Referent   | 1.00                                                     | Referent   | 1.00    | Referent   |
| Rural                                                     | 1.12                                                  | 0.96, 1.29  | 1.12    | 0.97, 1.30 | 1.09                                                     | 1.02, 1.17 | 1.05    | 0.98, 1.13 |
| <b>Insurance Type at Delivery<sup>b</sup></b>             |                                                       |             |         |            |                                                          |            |         |            |
| Commercial                                                | 1.00                                                  | Referent    | 1.00    | Referent   | 1.00                                                     | Referent   | 1.00    | Referent   |
| Medicaid                                                  | 2.14                                                  | 1.81, 2.53  | 2.11    | 1.76, 2.52 | 1.78                                                     | 1.65, 1.92 | 1.55    | 1.42, 1.68 |
| <b>Mode of Delivery<sup>c</sup></b>                       |                                                       |             |         |            |                                                          |            |         |            |
| Vaginal                                                   | 1.00                                                  | Referent    | 1.00    | Referent   | 1.00                                                     | Referent   | 1.00    | Referent   |
| Cesarean                                                  | 1.65                                                  | 1.43, 1.91  | 1.48    | 1.27, 1.72 | 1.43                                                     | 1.33, 1.53 | 1.37    | 1.28, 1.48 |
| <b>Extended Delivery Length of Stay<sup>d</sup></b>       | 2.23                                                  | 1.92, 2.60  | 1.77    | 1.51, 2.08 | 1.84                                                     | 1.71, 1.99 | 1.46    | 1.35, 1.58 |
| <b>SMM at Delivery (no blood transfusion)<sup>e</sup></b> | 8.37                                                  | 5.94, 11.78 | 5.73    | 4.04, 8.14 | 2.54                                                     | 1.92, 3.37 | 1.97    | 1.48, 2.61 |
| <b>Prepregnancy Diabetes<sup>f</sup></b>                  | 3.05                                                  | 2.27, 4.09  | 2.92    | 2.17, 3.93 | 2.76                                                     | 2.39, 3.18 | 2.78    | 2.41, 3.21 |
| <b>Gestational Diabetes<sup>f</sup></b>                   | 1.07                                                  | 0.84, 1.37  | 1.08    | 0.84, 1.38 | 1.20                                                     | 1.08, 1.34 | 1.29    | 1.15, 1.44 |
| <b>Hypertensive Disorders of Pregnancy<sup>g</sup></b>    |                                                       |             |         |            |                                                          |            |         |            |
| Any                                                       | 2.37                                                  | 1.99, 2.83  | 2.32    | 1.95, 2.77 | 1.84                                                     | 1.68, 2.01 | 1.81    | 1.65, 1.98 |
| No evidence                                               | 1.00                                                  | Referent    | 1.00    | Referent   | 1.00                                                     | Referent   | 1.00    | Referent   |
| <b>Hypertensive Disorders of Pregnancy<sup>g</sup></b>    |                                                       |             |         |            |                                                          |            |         |            |
| Chronic Hypertension                                      | 2.90                                                  | 2.14, 3.92  | 2.82    | 2.08, 3.81 | 2.11                                                     | 1.80, 2.48 | 2.13    | 1.82, 2.50 |

|                                            |      |            |      |            |      |            |      |            |
|--------------------------------------------|------|------------|------|------------|------|------------|------|------------|
| Gestational Hypertension                   | 1.80 | 1.34, 2.41 | 1.77 | 1.32, 2.37 | 1.29 | 1.11, 1.51 | 1.28 | 1.09, 1.50 |
| Preeclampsia/Eclampsia                     | 3.05 | 2.25, 4.13 | 2.99 | 2.21, 4.06 | 2.01 | 1.69, 2.38 | 1.94 | 1.64, 2.30 |
| Superimposed                               | 2.08 | 1.30, 3.31 | 2.02 | 1.27, 3.23 | 2.75 | 2.28, 3.30 | 2.63 | 2.19, 3.16 |
| No evidence                                | 1.00 | Referent   | 1.00 | Referent   | 1.00 | Referent   | 1.00 | Referent   |
| <b>Substance Use Disorder<sup>h</sup></b>  |      |            |      |            |      |            |      |            |
| Any                                        | 2.83 | 2.33, 3.44 | 2.76 | 2.26, 3.38 | 2.19 | 1.98, 2.42 | 1.89 | 1.70, 2.09 |
| Any (excluding cannabis)                   | 3.01 | 2.45, 3.68 | 2.92 | 2.37, 3.60 | 2.30 | 2.07, 2.56 | 1.98 | 1.78, 2.21 |
| <b>Mental Health Diagnosis<sup>i</sup></b> |      |            |      |            |      |            |      |            |
| Any                                        | 1.52 | 1.21, 1.90 | 1.51 | 1.20, 1.90 | 2.13 | 1.94, 2.34 | 2.07 | 1.89, 2.28 |
| Depression                                 | 1.98 | 1.30, 3.02 | 1.96 | 1.29, 3.00 | 2.23 | 1.85, 2.69 | 2.14 | 1.78, 2.58 |
| Anxiety                                    | 1.55 | 1.12, 2.14 | 1.55 | 1.12, 2.14 | 2.02 | 1.77, 2.31 | 1.98 | 1.74, 2.27 |
| Serious Mental Illness                     | 1.32 | 0.92, 1.90 | 1.28 | 0.92, 1.90 | 2.38 | 2.09, 2.71 | 2.33 | 2.04, 2.65 |
| Other                                      | 1.66 | 1.05, 2.61 | 1.64 | 1.04, 2.59 | 2.86 | 2.43, 3.36 | 2.71 | 2.31, 3.20 |

**Notes:** SMM, severe maternal morbidity.

**a.** Model adjusted for maternal age.

**b.** Model adjusted for maternal age, maternal residential location, any substance use disorder (SUD), and any mental health (MH) diagnosis.

**c.** Model adjusted for maternal age, maternal residential location, insurance type at delivery, any SUD, any MH diagnosis, any diabetes, and any hypertensive disorders of pregnancy (HDP).

**d.** Model adjusted for maternal age, maternal residential location, insurance type at delivery, any SUD, any MH diagnosis, any diabetes, HDP, and mode of delivery.

**e.** model adjusts for maternal age, maternal residential location, insurance type at delivery, any diabetes, and HDP.

**f.** Model adjusted for maternal age, maternal residential location, any SUD, and any MH diagnosis.

**g.** Models adjusted for maternal age, maternal residential location, any SUD, and any MH diagnosis.

**h.** Model adjusted for maternal age, maternal residential location, and any MH diagnosis.

**i.** Model adjusted for maternal age and maternal residential location.
